# Supplementary figures and images for: Facile tailoring of the electrical transport in representative hole transport materials by molecular doping
Source: Royal Society of Chemistry journal article supplement (doi:10.1039/c8ra03707h), 2018-01-01

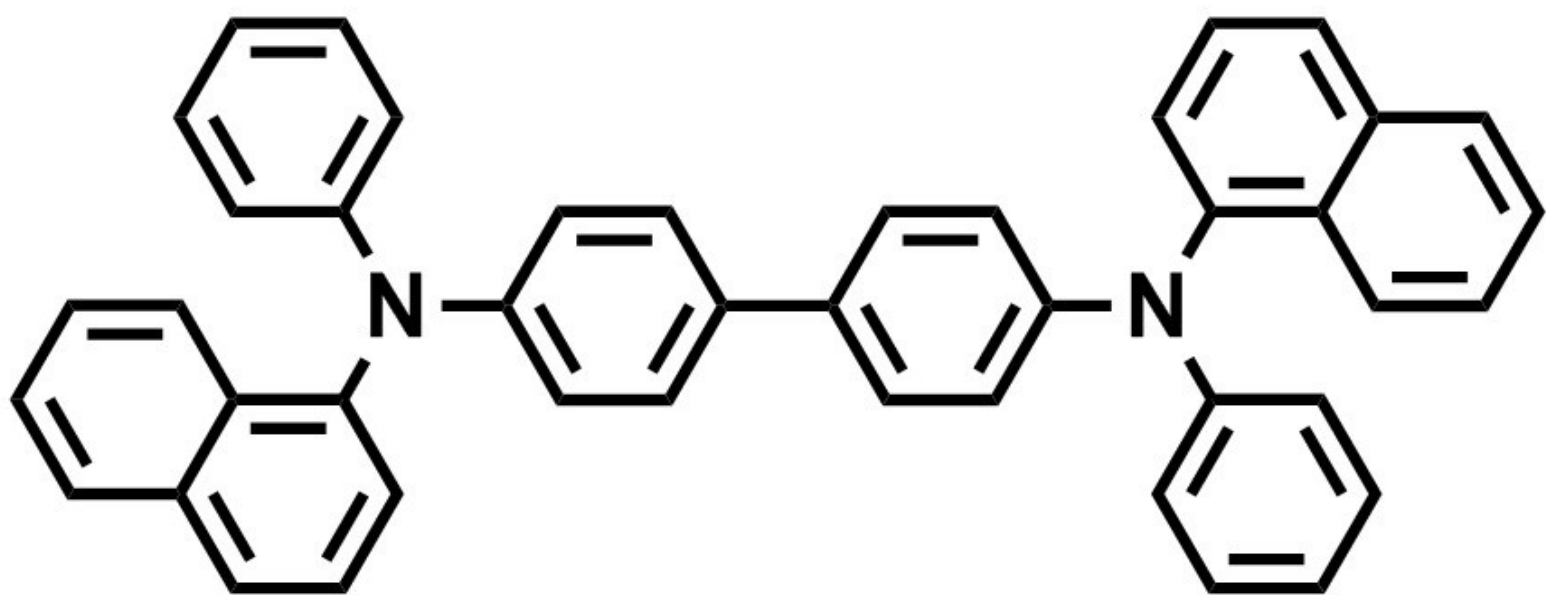

**NPB**

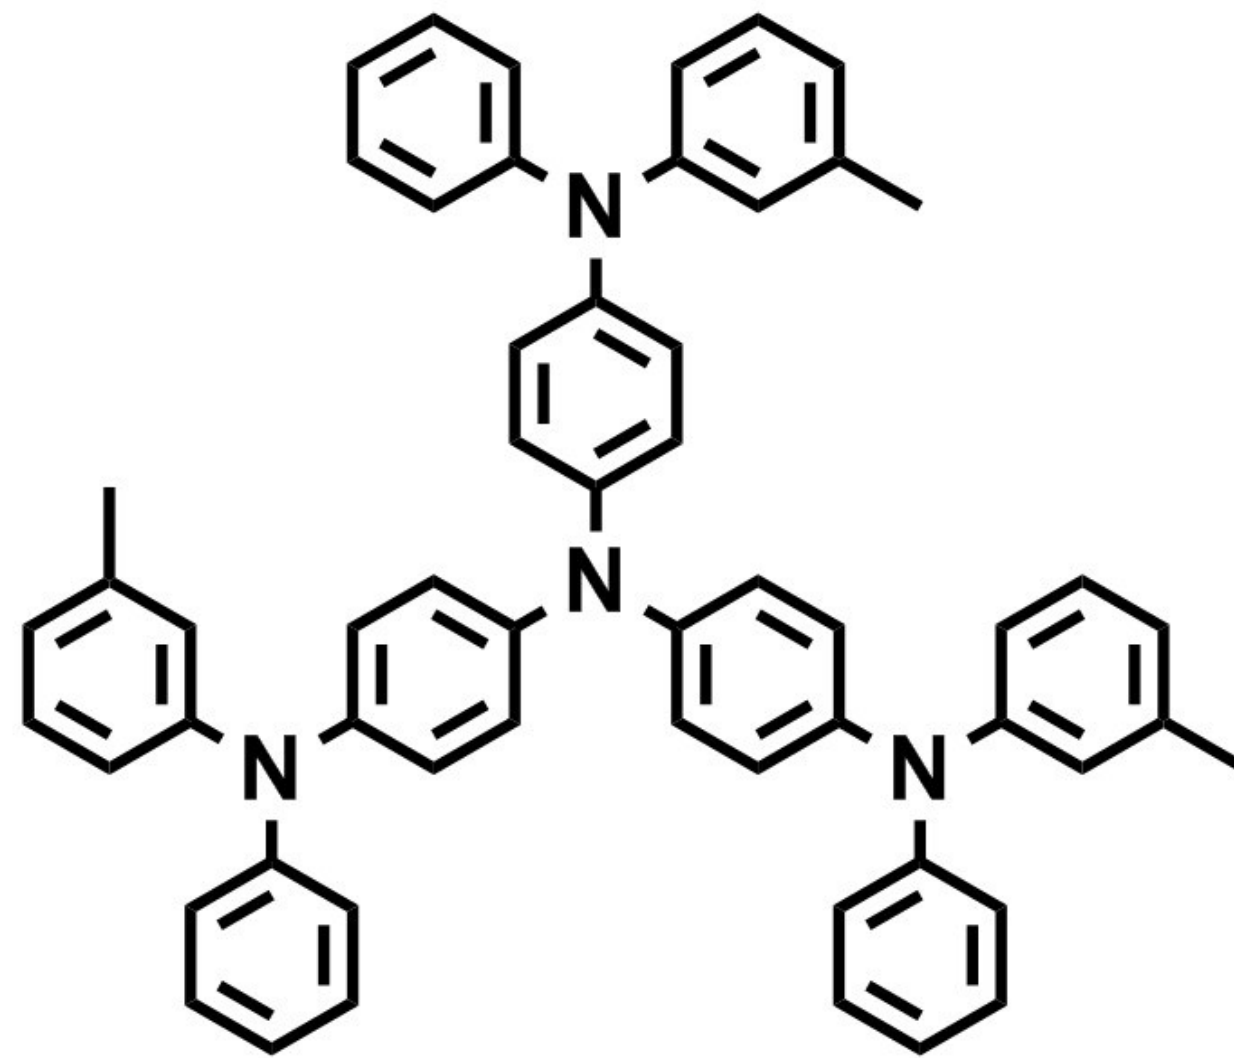

***m*-MTDATA**

Supplement: c8ra03707h1.pdf [file c8ra03707h1.pdf]
